# Supplementary material for: Oxygen vacancies modulating the photodetector performances in ε-Ga2O3 thin films
Source: Royal Society of Chemistry journal article supplement (doi:10.1039/d1tc00616a), 2021-01-01
Supplement: d1tc00616a1.pdf [file d1tc00616a1.pdf]

## Supporting Information

### Oxygen Vacancies Modulating the Photodetector Performances in $\epsilon$ -Ga<sub>2</sub>O<sub>3</sub> Thin Films

Shan Li,<sup>†</sup> Jianying Yue,<sup>†</sup> Xueqiang Ji,<sup>†</sup> Chao Lu,<sup>†</sup> Zuyong Yan,<sup>†</sup> Peigang Li,<sup>\*,†</sup>

Daoyou Guo,<sup>\*,‡</sup> Zhenping Wu,<sup>†</sup> and Weihua Tang<sup>\*,†,§</sup>

<sup>†</sup> Laboratory of Information Functional Materials and Devices, School of Science, State Key Laboratory of Information Photonics and Optical Communications, Beijing University of Posts and Telecommunications, Beijing 100876, China.

<sup>‡</sup> Center for Optoelectronics Materials and Devices & Key Laboratory of Optical Field Manipulation of Zhejiang Province, Department of Physics, Zhejiang Sci-Tech University, Hangzhou 310018, China.

<sup>§</sup> College of Electronic and Optical Engineering & College of Microelectronics, National and Local Joint Engineering Laboratory for RF Integration and Micro-Packaging Technologies, Nanjing University of Posts and Telecommunications, Nanjing 210046, China

\*E-mail: [pgli@bupt.edu.cn](mailto:pgli@bupt.edu.cn).

\*E-mail: [dyguo@zstu.edu.cn](mailto:dyguo@zstu.edu.cn).

\*E-mail: [whtang@bupt.edu.cn](mailto:whtang@bupt.edu.cn).

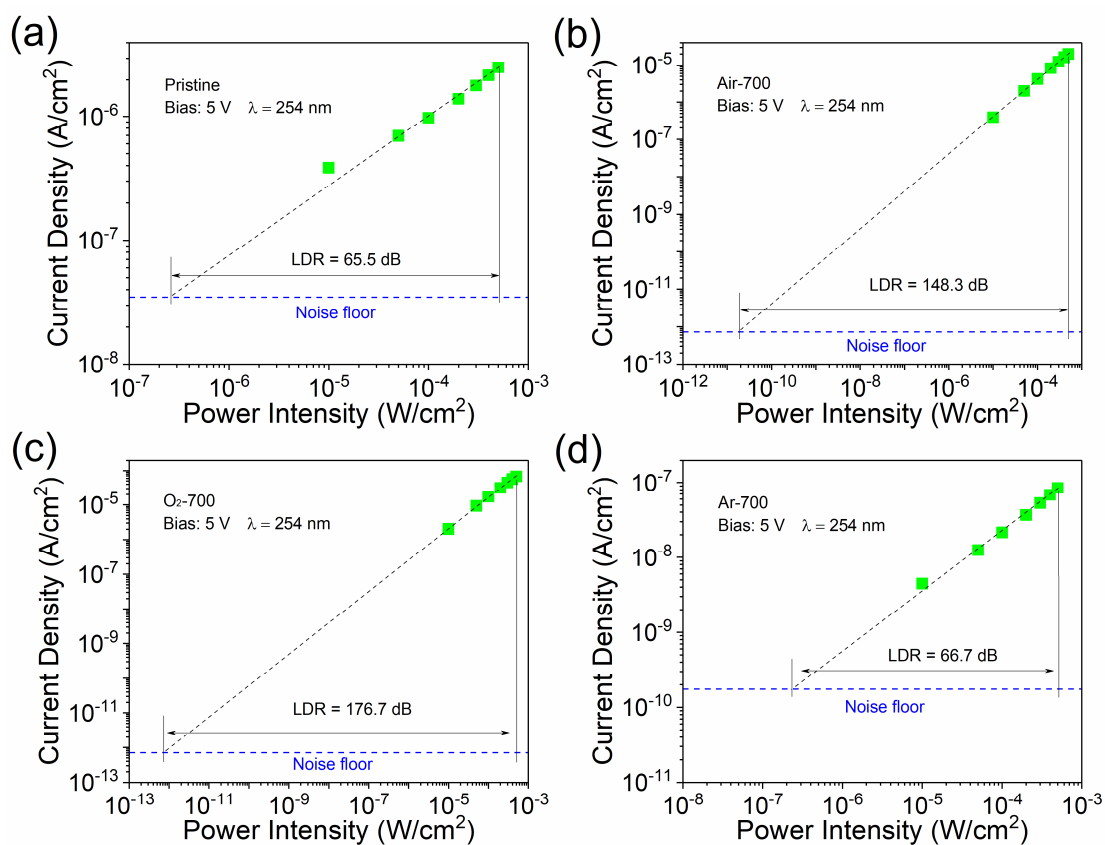

**Fig. S1** Linear dynamic ranges of the  $\epsilon$ -Ga<sub>2</sub>O<sub>3</sub> based photodetectors under different post-annealing conditions: (a) pristine, (b) Air-700, (c) O<sub>2</sub>-700 and (d) Ar-700. The noise floors are the dark current densities of the corresponding  $\epsilon$ -Ga<sub>2</sub>O<sub>3</sub> photodetectors which are measured without any light radiations.

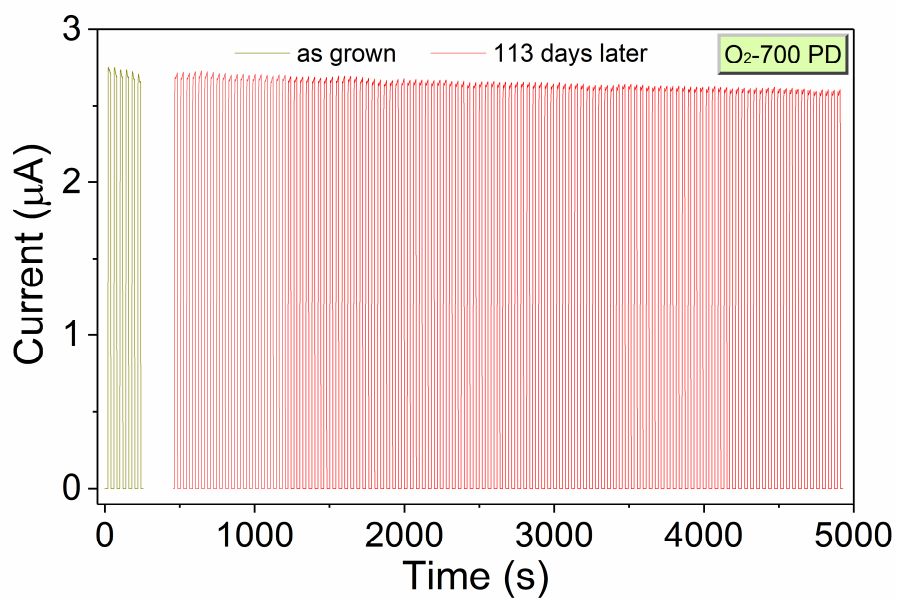

**Fig. S2** The operation stability of the O<sub>2</sub>-700 photodetector measured at as-grown status (2020-11-23) and after 113 days later (2021-3-16) under 5 V bias with 254 nm light intensity of 500 μW/cm<sup>2</sup>.

**Table S1** The fitting response speeds evaluated from the Figure 4(f)

| Sample                                                                   | Rise/decay time (ms)  |                       |
|--------------------------------------------------------------------------|-----------------------|-----------------------|
|                                                                          | $\tau_{r1}/\tau_{r2}$ | $\tau_{d1}/\tau_{d2}$ |
| Ti/ $\epsilon$ -Ga <sub>2</sub> O <sub>3</sub> /Ti (Pristine)            | 263/1709              | 169/3897              |
| Ti/ $\epsilon$ -Ga <sub>2</sub> O <sub>3</sub> /Ti (Air-700)             | 79.1/573              | 152.3/186.1           |
| Ti/ $\epsilon$ -Ga <sub>2</sub> O <sub>3</sub> /Ti (O <sub>2</sub> -700) | 61.1/355              | 87.5/106.9            |
| Ti/ $\epsilon$ -Ga <sub>2</sub> O <sub>3</sub> /Ti (Ar-700)              | 782.7/782.9           | 175.2/2380            |
